# Supplementary material
Source: publisher figshare collection journal article supplement (https://acs.figshare.com/ndownloader/files/3723247)
Supplement: Supplementary file 1 [file 3723247]

# **A General Synthetic Approach for Integrated Nanocatalysts of Metal-Silica@ZIFs**

Baojuan Xi,<sup>a,b</sup> Ying Chuan Tan,<sup>a</sup> and Hua Chun Zeng<sup>a,\*</sup>

<sup>a</sup>*Department of Chemical and Biomolecular Engineering, Faculty of Engineering, National University of Singapore, 10 Kent Ridge Crescent, Singapore 119260*

<sup>b</sup>*School of Chemistry and Chemical Engineering, Shandong University  
No 27 Shandananlu, Jinan, Shandong, 250100, China*

*\*Email: chezhc@nus.edu.sg*

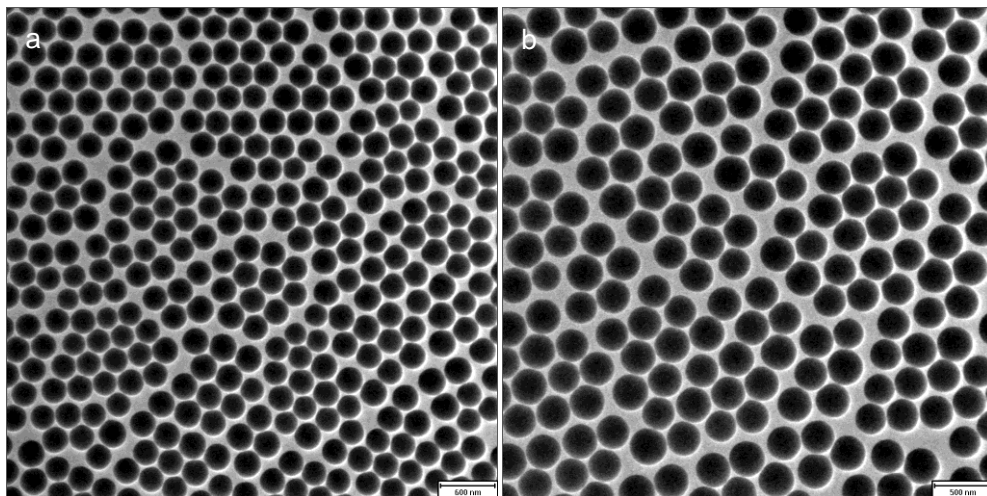

**Figure S1** (a,b) TEM images (at different magnifications) of monodisperse Stober  $\text{SiO}_2$  spheres.

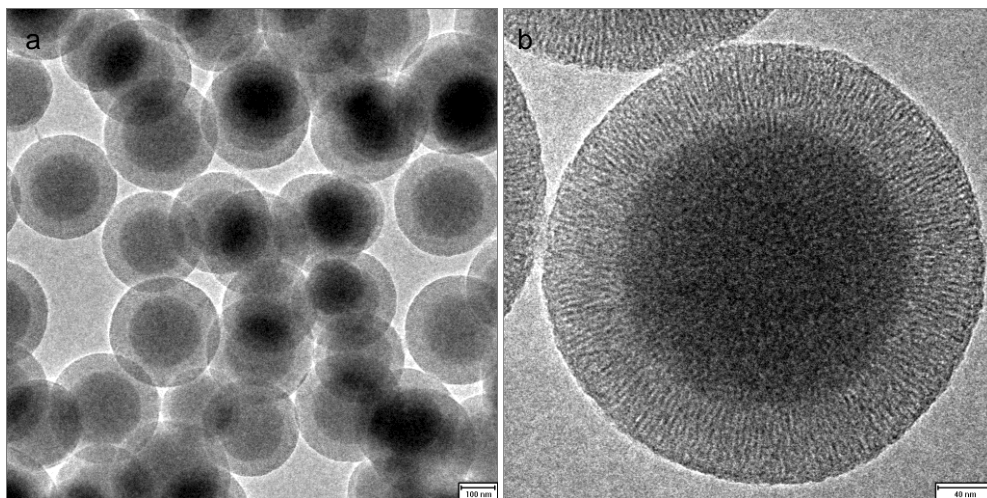

**Figure S2** (a,b) TEM images (at different magnifications) of mesoporous  $\text{SiO}_2$  spheres synthesized at 120 °C for 12 h.

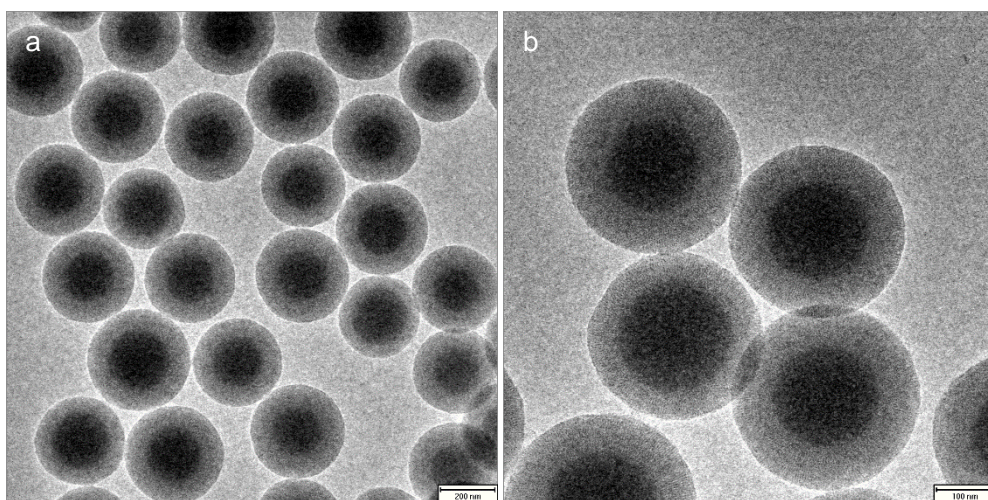

**Figure S3** (a,b) TEM images (at different magnifications) of mesoporous SiO<sub>2</sub> spheres synthesized hydrothermally at 160 °C for 12 h.

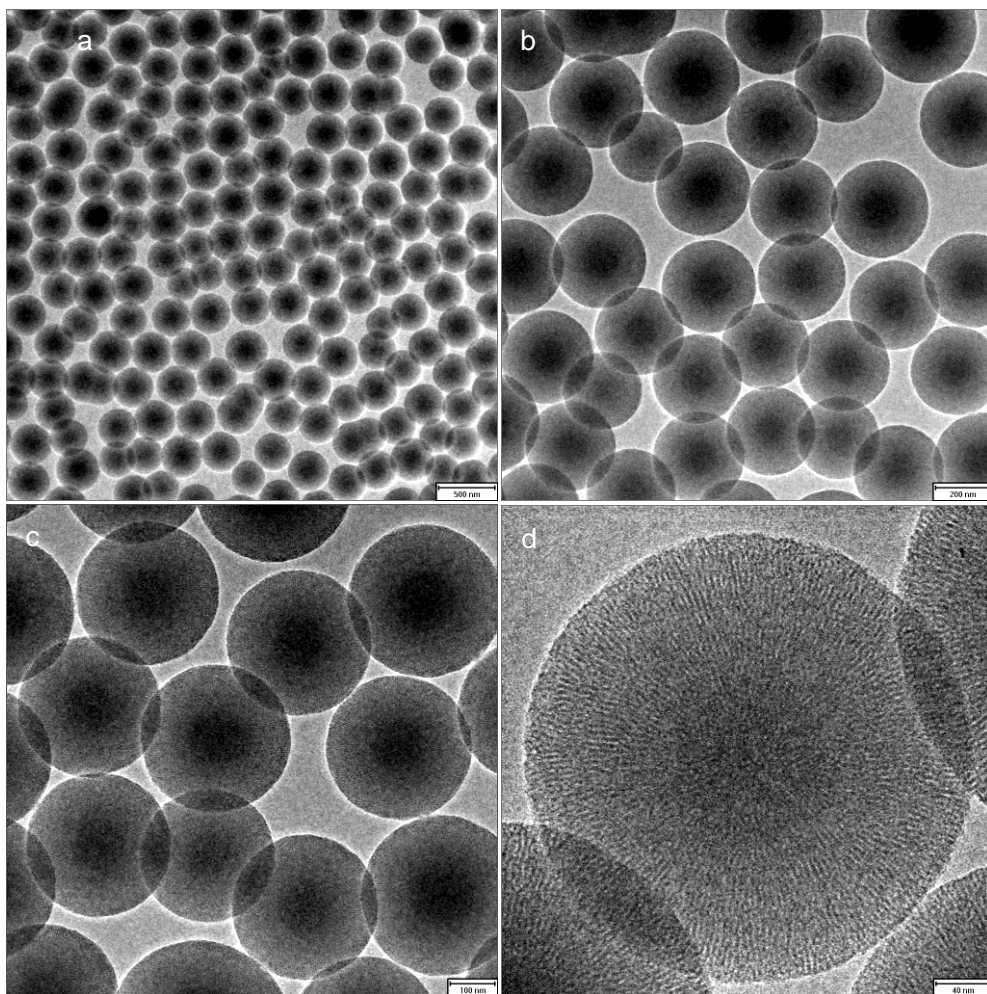

**Figure S4** (a–d) TEM images (at different magnifications) of mesoporous SiO<sub>2</sub> spheres obtained with 0.2 g CTAB (concentration of 18.3 mM) at 160 °C for 12 h.

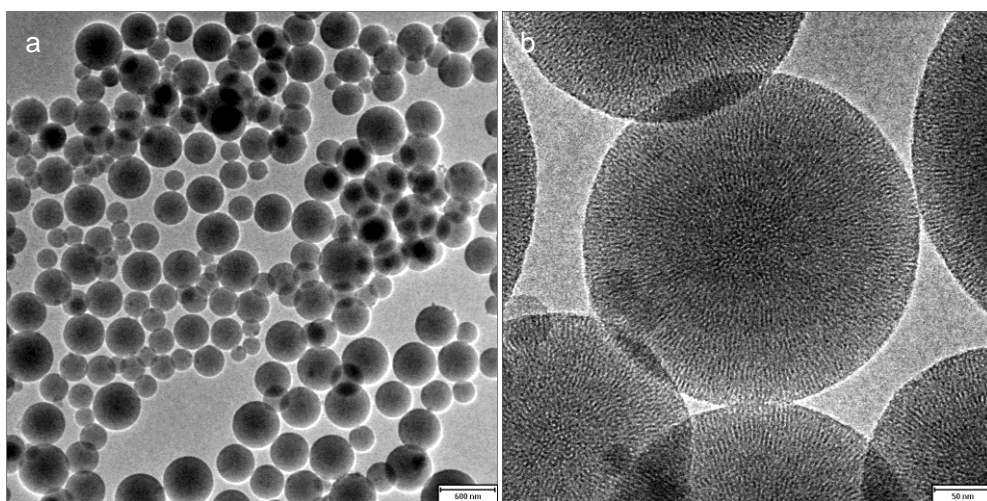

**Figure S5** (a,b) TEM images (at different magnifications) of mesoporous SiO<sub>2</sub> spheres obtained with 5.2 mM CTAB at 180 °C for 12 h.

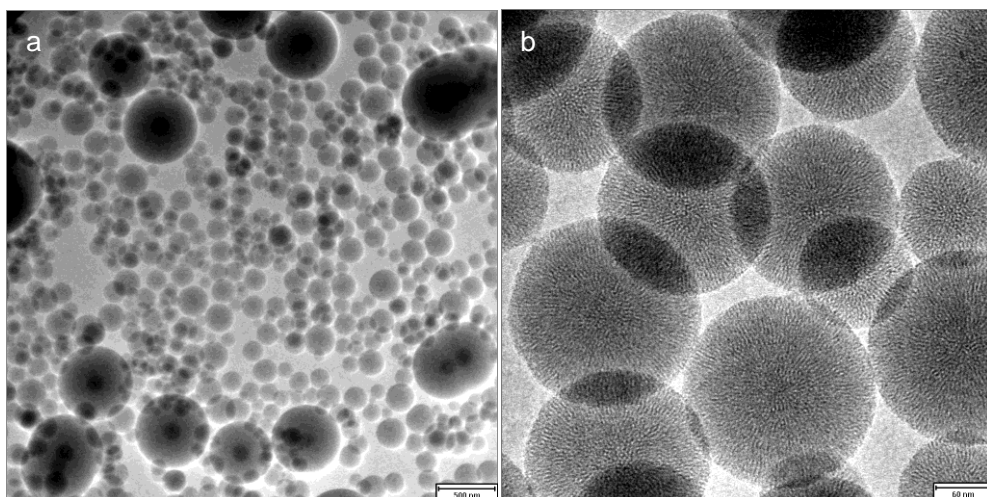

**Figure S6** (a,b) TEM images (at different magnifications) of mesoporous SiO<sub>2</sub> spheres obtained with 18.3 mM CTAB at 180 °C for 12 h.

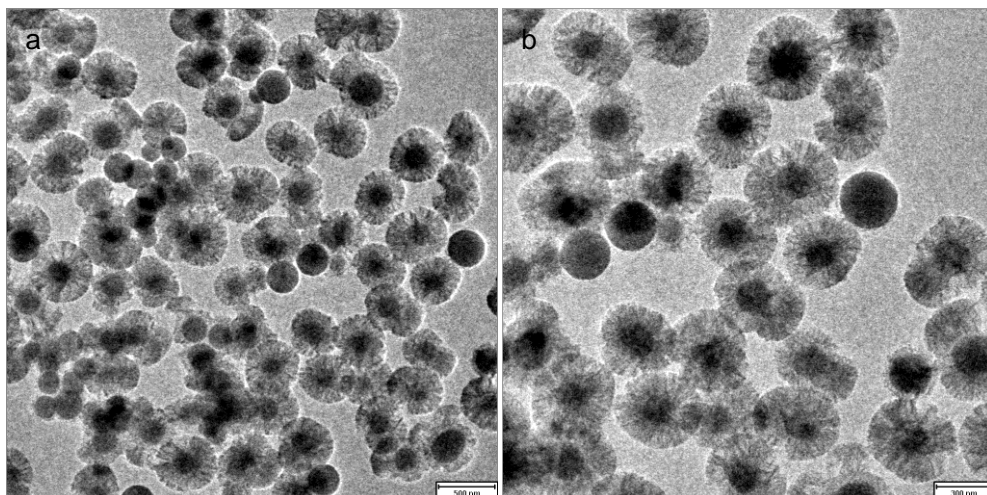

**Figure S7** (a,b) TEM images (at different magnifications) of pore-expanded mesoporous SiO<sub>2</sub> at 140 °C for 12 h with addition of 0.25 mL DMDA.



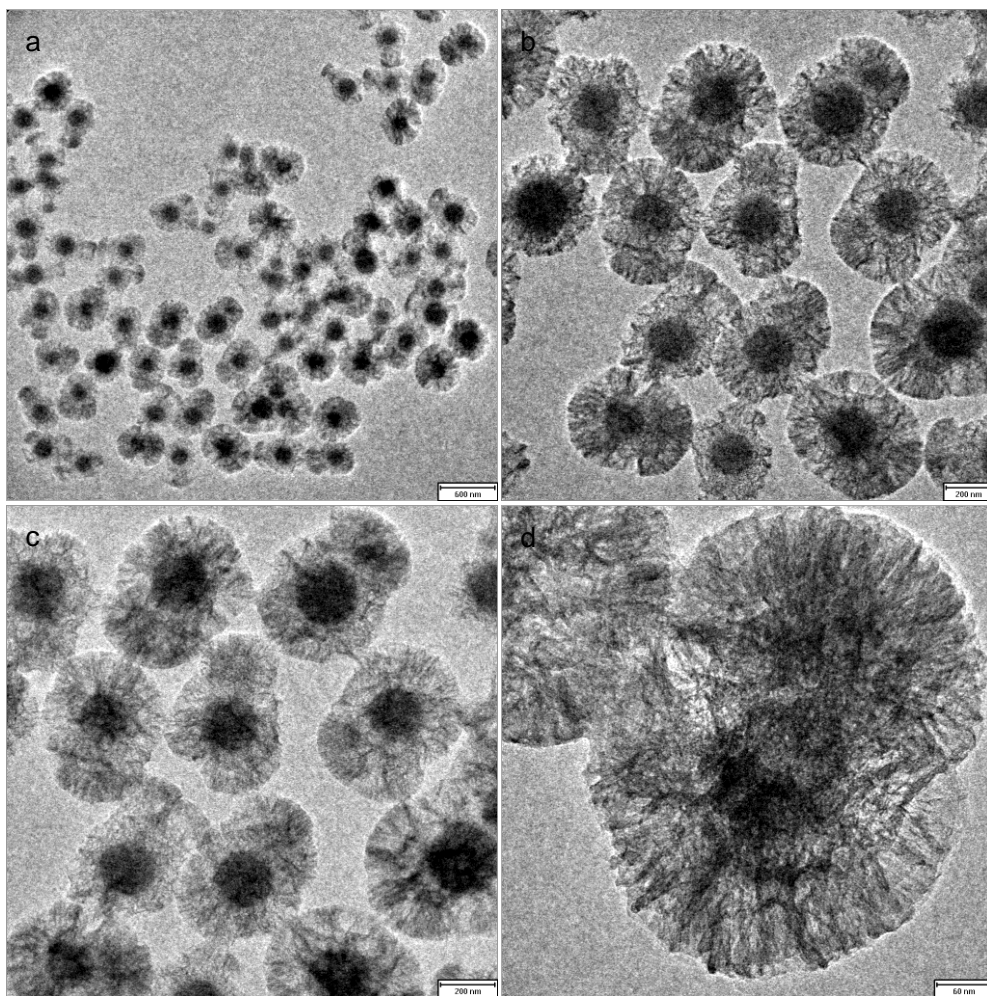

**Figure S8** (a–d) TEM images (at different magnifications) of pore-expanded mesoporous SiO<sub>2</sub> at 140 °C for 12 h with addition of 0.5 mL of DMDA.

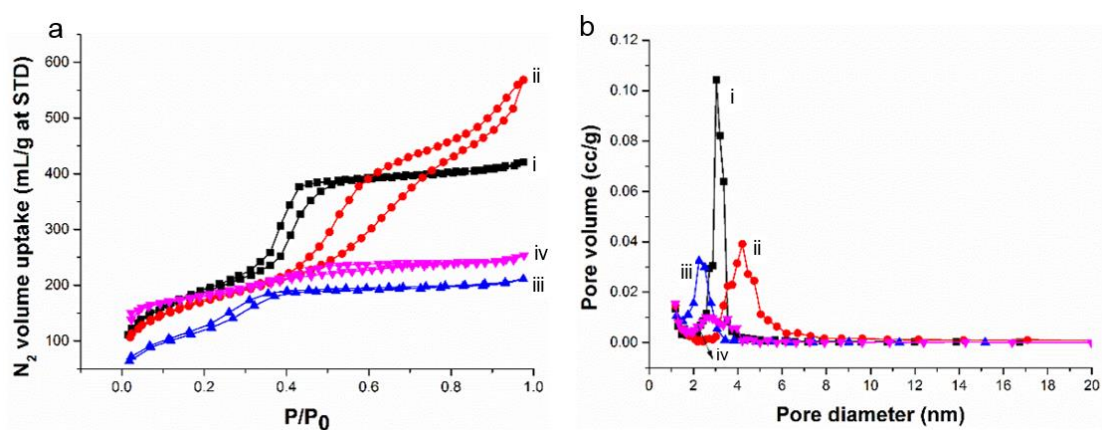

**Figure S9** (a) Isothermal nitrogen adsorption-desorption loops and (b) corresponding BJH pore size distribution of (i) normal MCM-41 SiO<sub>2</sub>, (ii) pore-expanded mesoporous SiO<sub>2</sub>, (iii) Pd-*m*SiO<sub>2</sub>, and (iv) Pd-*m*SiO<sub>2</sub>@ZIF-8.

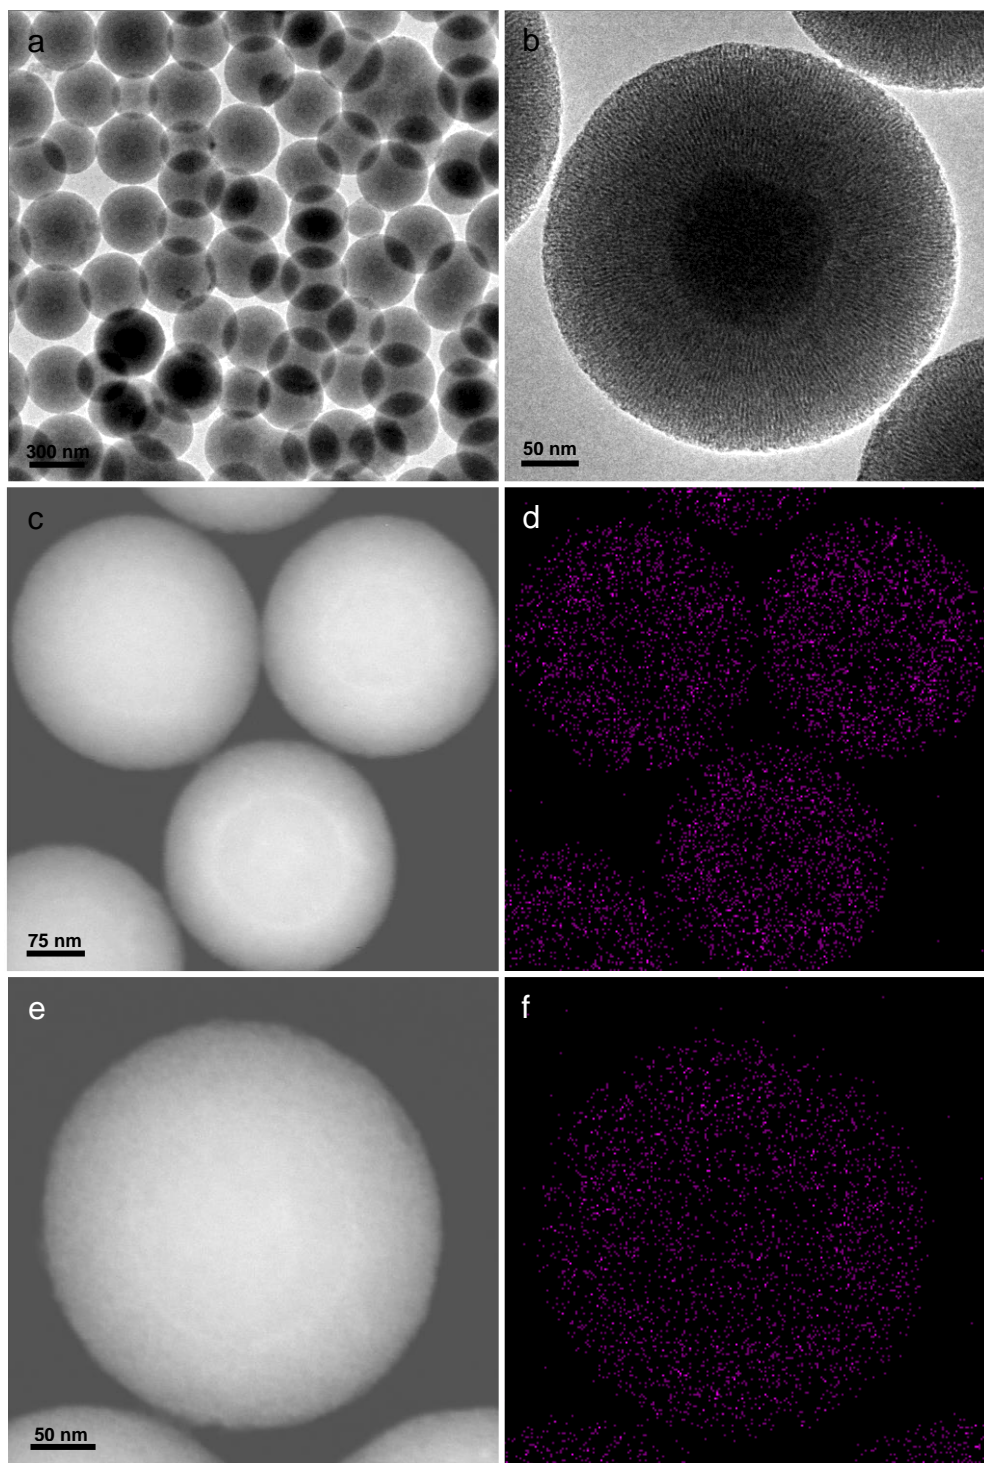

**Figure S10** (a,b) TEM images (at different magnifications), (c,e) HAADF-STEM, and (d,f) corresponding Pt mapping images of Pt-*m*SiO<sub>2</sub> spheres with K<sub>2</sub>PtCl<sub>4</sub> aqueous solution as precursor.



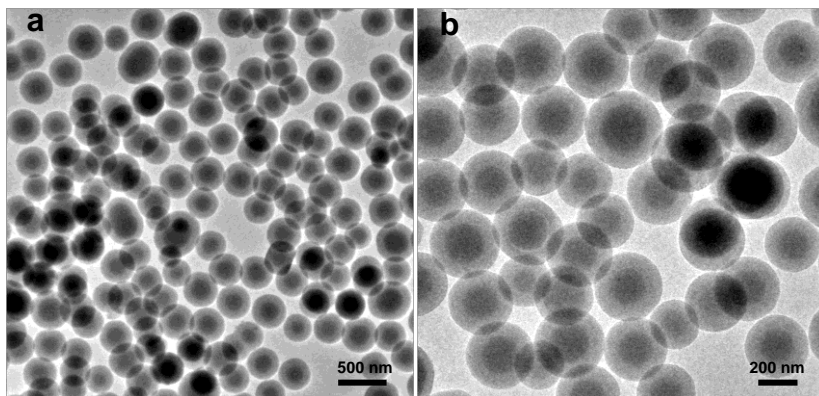

**Figure S11** (a,b) TEM images (at different magnifications) of monodisperse Pd-*m*SiO<sub>2</sub> spheres with Pd(OAc)<sub>2</sub> dissolved in acetone.

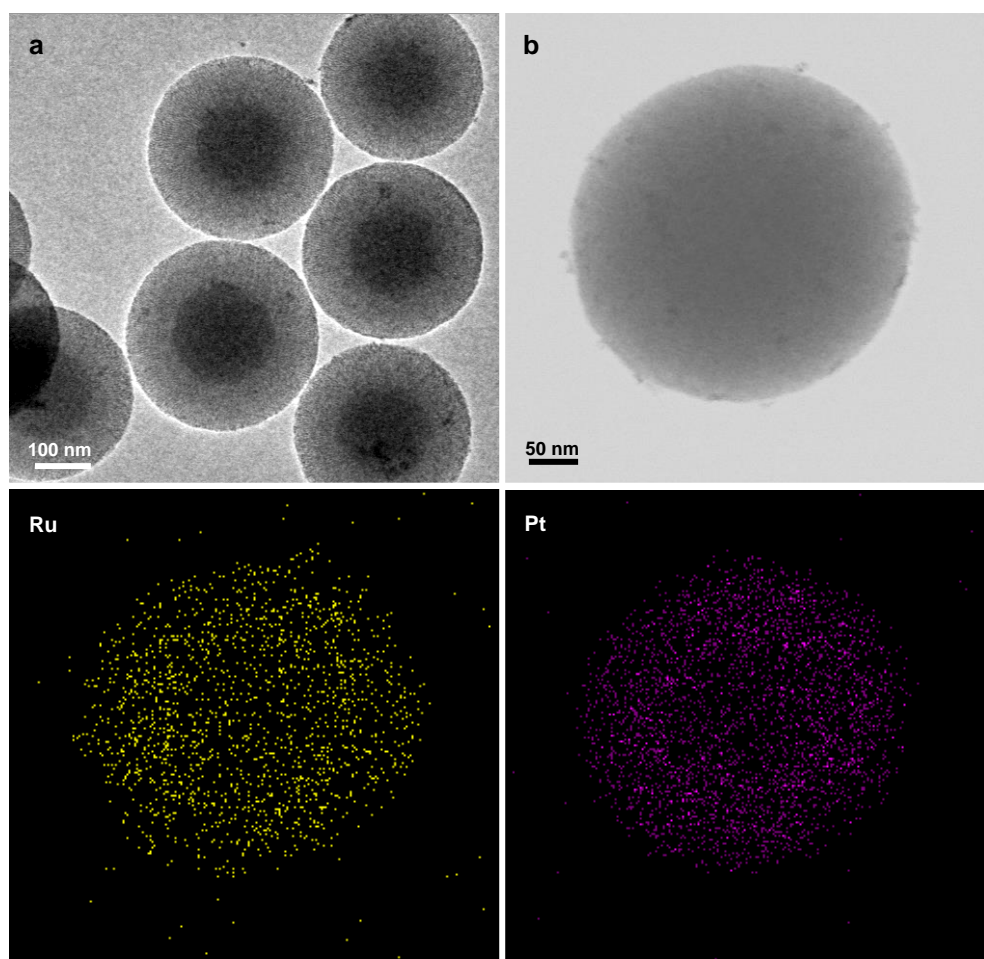

**Figure S12** (a) TEM image of monodisperse Ru<sub>47</sub>Pt<sub>53</sub>-*m*SiO<sub>2</sub> spheres, and (b) STEM image and its related mapping images (Ru and Pt) of a typical sphere.



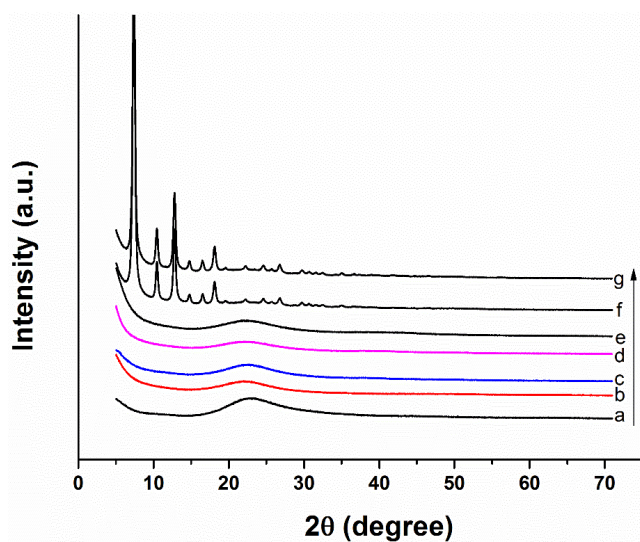

**Figure S13** XRD patterns of (a) mesoporous SiO<sub>2</sub> spheres, (b) Ru-*m*SiO<sub>2</sub>, (c) Ag-*m*SiO<sub>2</sub>, (d) Pd-*m*SiO<sub>2</sub>, (e) RuPt-*m*SiO<sub>2</sub>, and Pd-*m*SiO<sub>2</sub>@ZIF-8 prepared in methanol (f) before and (g) after calcination.

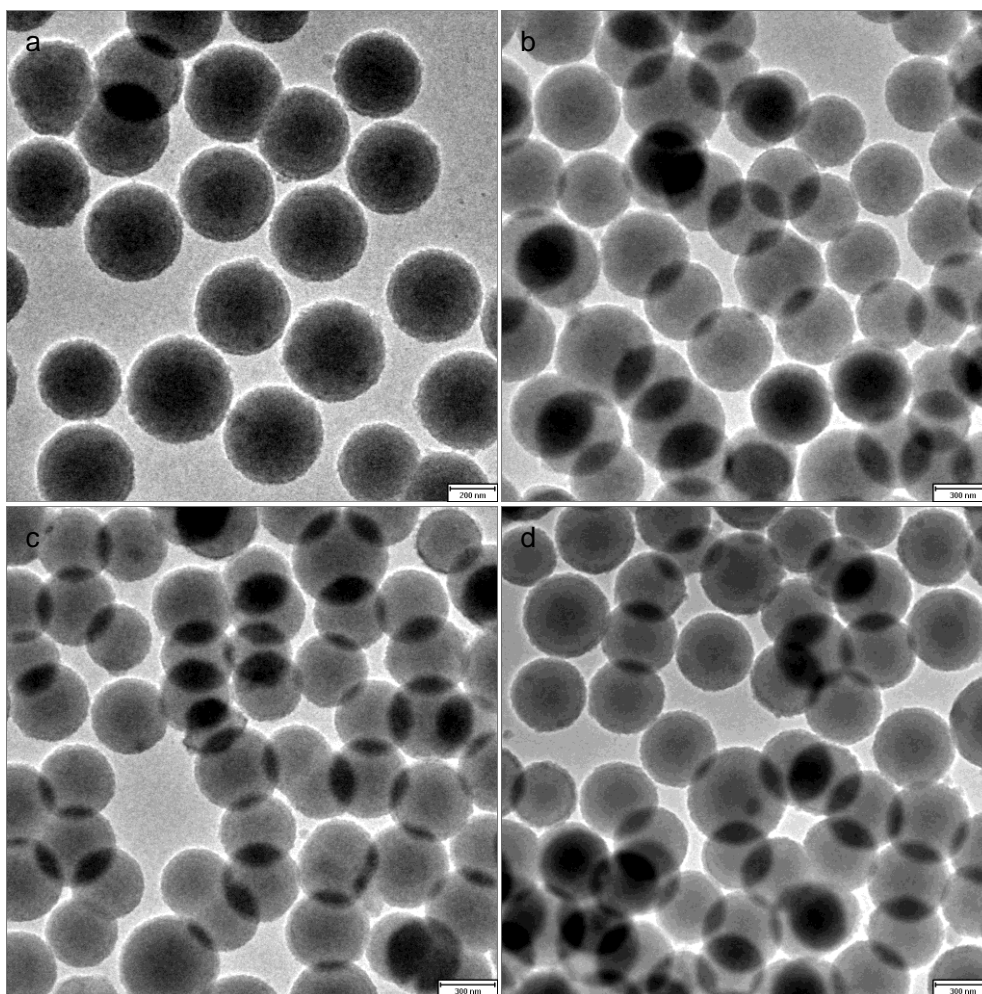

**Figure S14** TEM images of Pt-*m*SiO<sub>2</sub>@ZIF-8 fabricated with different amounts of PVP while keeping other conditions identical: (a) 0.01 g, (b) 0.02 g, (c) 0.03 g, and (d) 0.04 g.

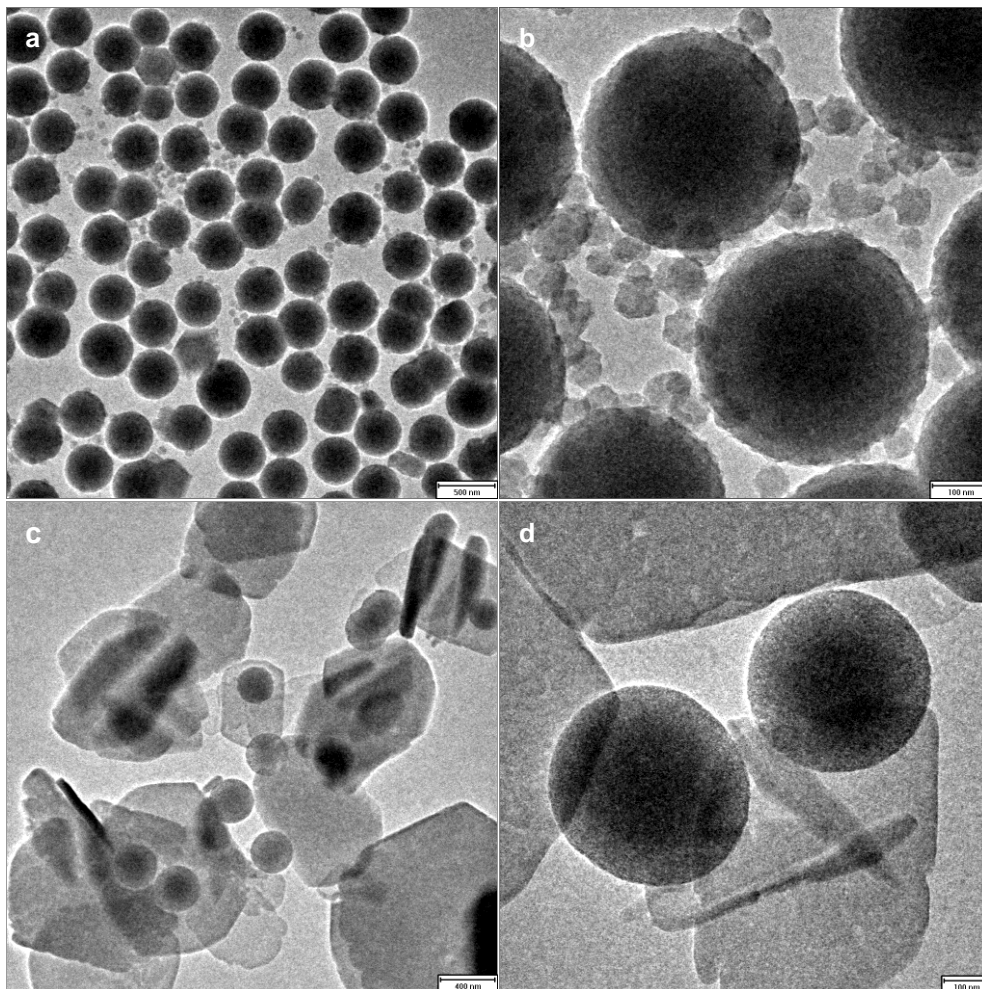

**Figure S15** TEM images of Pt-*m*SiO<sub>2</sub>/ZIF-8 prepared with different precursors in the presence of 0.02 g PVP: (a,b) 2.5 mL of 0.0672 M Zn(NO<sub>3</sub>)<sub>2</sub> (0.168 mmol) and 1.1 mmol of 2-MeIM, and (c,d) 3.75 mL of 0.0672 M Zn(NO<sub>3</sub>)<sub>2</sub> (0.252 mmol ) and 1.65 of mmol 2-MeIM.

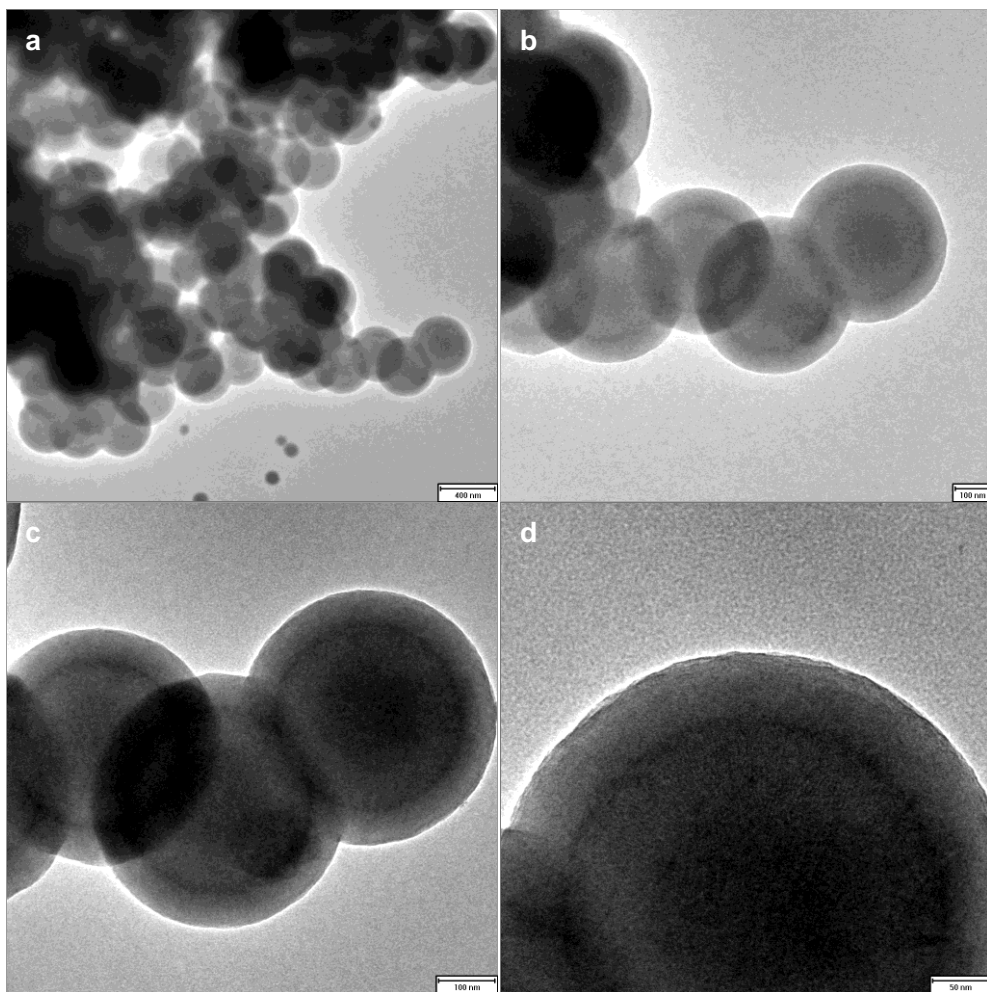

**Figure S16** (a–d) TEM images (at different magnifications) of Pt-*m*SiO<sub>2</sub> after coating with ZIF-8 fabricated without the addition of PVP.



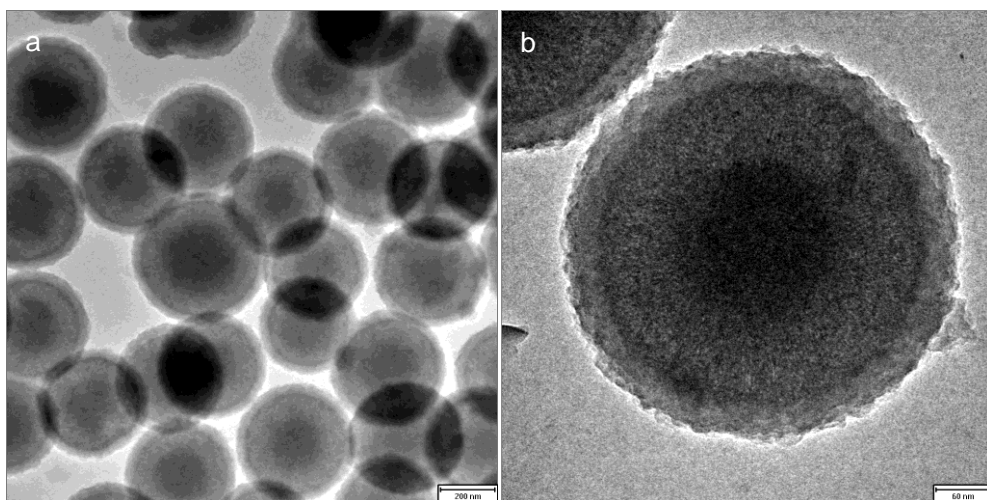

**Figure S17** (a,b) TEM images (at different magnifications) of Pt-*m*SiO<sub>2</sub>@ZIF-8 intermediate collected after adding 2-MeIM for 1.5 h.

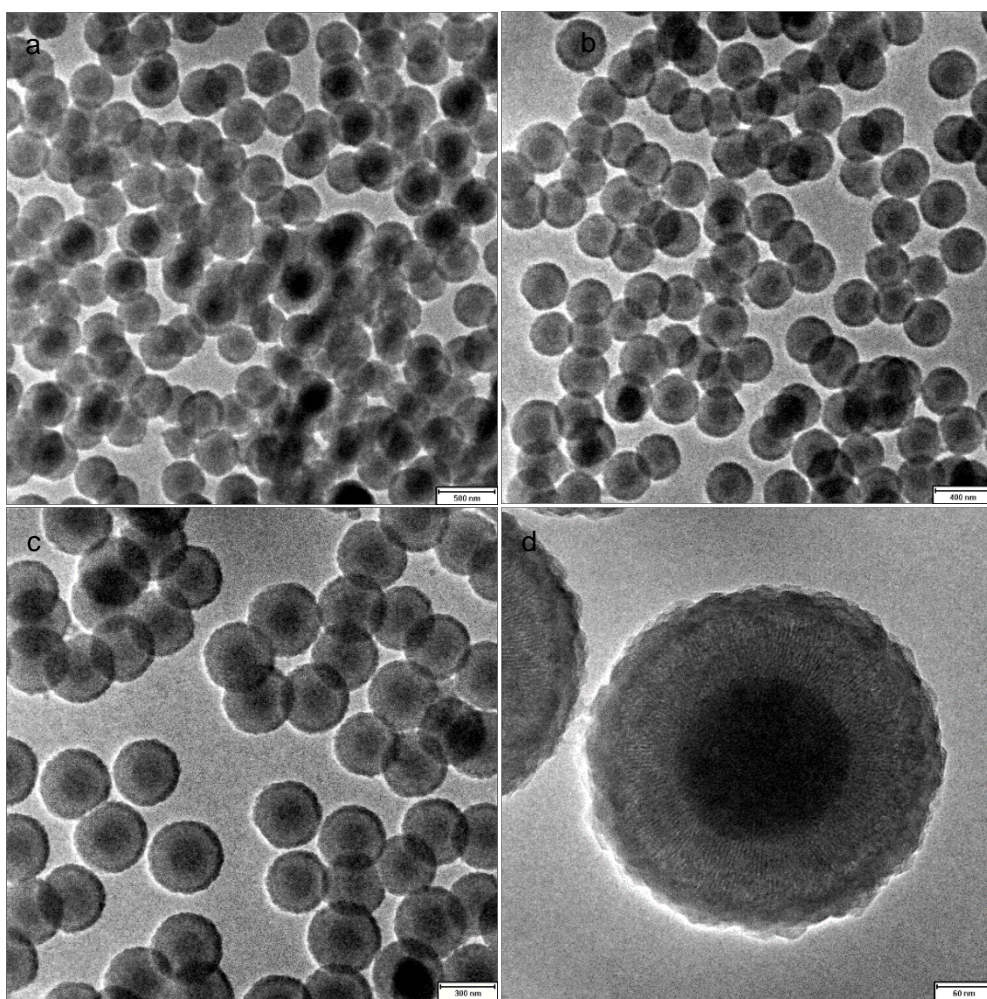

**Figure S18** TEM images (at different magnifications) of Pd-*m*SiO<sub>2</sub>@ZIF-8 prepared with methanol as a solvent.



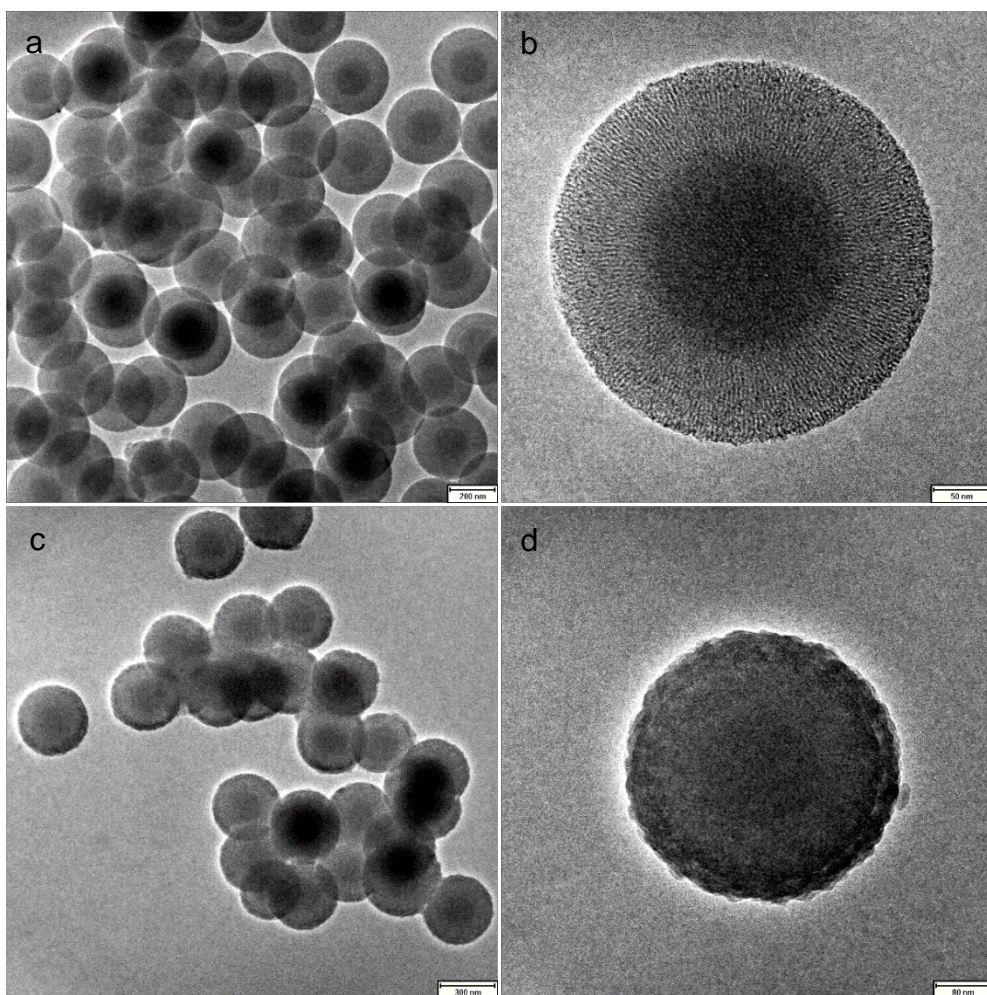

**Figure S19** TEM images (at different magnifications) of (a,b) Pd-*m*SiO<sub>2</sub> spheres and (c,d) Pd-*m*SiO<sub>2</sub>@ZIF-8 composite spheres after catalytic hydrogenation reaction.
